# Supplementary material
Source: ML conference proceedings conference paper supplement (https://proceedings.neurips.cc/paper_files/paper/2022/hash/c7207c38b6e809a83d0688936a91c3b5-Abstract.html)
Supplement: Supplementary file 1 [file c7207c38b6e809a83d0688936a91c3b5-Supplemental-Conference.zip]

Archive with 2 entries (2 files):
- 8204_NeurIPS_2022_usparse_appendix.pdf
- __MACOSX/._8204_NeurIPS_2022_usparse_appendix.pdf
